# Supplementary material
Source: PubMed Central journal article supplement (PMC7756990)
Supplement: advancesADV2020003277-suppl1.pdf [file advancesADV2020003277-suppl1.pdf]

## Supplementary materials

### Table of contents

1. **Supplementary Table 1.** Characteristics of study subjects
2. **Supplementary Figure 1.** 100-day CMV reactivation (any viremia) and cs-CMV<sub>i</sub> by donor serostatus among CMV-seropositive recipients.
3. **Supplementary Figure 2.** Antibiotic exposure by day +14 following allogeneic HCT
4. **Supplementary Figure 3** 100-day cumulative incidence of CMV reactivation (any viremia) by antibiotic use by day +14
5. **Supplementary Figure 4** 100-day cumulative incidence of clinically significant CMV reactivation by antibiotic use by day +14
6. **Supplementary Figure 5** One-year cumulative incidence of all-cause mortality by antibiotic use by day +14
7. **Supplementary Figure 6** One-year cumulative incidence of non-relapse mortality by antibiotic use by day +14
8. **Supplementary Figure 7.** Increased mortality in patients exposed to anaerobic antibiotics.

| <b>Supplementary table 1. Characteristics of study subjects</b> |                                   |
|-----------------------------------------------------------------|-----------------------------------|
| <b>Characteristic</b>                                           | <b>Number of patients<br/>(%)</b> |
| Age, median (IQR), years                                        | 52 (43-61)                        |
| Male sex                                                        | 80 (54)                           |
| Follow-up, median (IQR), posttransplant days                    | 441 (225-833)                     |
| Initial CMV viremia, median (IQR), IU/mL <sup>¶</sup>           | 137 (96-181)                      |
| Peak CMV viremia, median (IQR), IU/mL <sup>¶</sup>              | 842 (185-3,962)                   |
| CMV viremia preceding therapy, median (IQR), IU/mL <sup>†</sup> | 685 (320-1,449)                   |
| Duration of CMV viremia, median (IQR), days <sup>^</sup>        | 38 (24-48)                        |
| CMV <sup>¶</sup>                                                |                                   |
| Asymptomatic                                                    | 91 (85)                           |
| CMV syndrome                                                    | 12 (11)                           |
| Tissue-invasive disease                                         | 4 (4)                             |
| Underlying diagnosis                                            |                                   |
| Leukemia                                                        | 90 (60)                           |
| Lymphoma                                                        | 19 (13)                           |
| MDS/MPN                                                         | 34 (23)                           |
| Other                                                           | 6 (4)                             |

|                                                        |              |
|--------------------------------------------------------|--------------|
| Conditioning regimen                                   |              |
| Myeloablative                                          | 49 (33)      |
| ATG <sup>∞</sup>                                       | 90 (60)      |
| Stem cell source                                       |              |
| Peripheral blood                                       | 135 (91)     |
| Bone marrow                                            | 11 (7)       |
| Umbilical cord                                         | 3 (2)        |
| Type of donor                                          |              |
| Unrelated or HLA-mismatched                            | 100 (67)     |
| Time to engraftment, median (IQR), days <sup>*</sup>   | 11 (10-14)   |
| aGVHD (grade 3-4)                                      | 12 (8)       |
| CD34+ cells infused (1×10 <sup>6</sup> ), median (IQR) | 7.8 (6.1-12) |
| Charlson Comorbidity Score, median (IQR)               | 3 (2-4)      |
| Lymphoid malignancy                                    | 46 (31)      |

Data are presented as absolute number (percentage), unless specified otherwise.

aGVHD, acute graft-versus-host disease; ATG, anti-thymocyte globulin; CMV, cytomegalovirus; IQR, interquartile range; MDS/MPN, myelodysplastic syndrome/myeloproliferative neoplasm.

<sup>∞</sup> Typical dose of ATG at our center is 4 mg/kg total

<sup>‡</sup> Among 107 patients with CMV reactivation

<sup>†</sup> Among 77 treated patients

<sup>^</sup> Among 94 patients who achieved resolution of viremia

<sup>\*</sup> Among 142 patients who engrafted

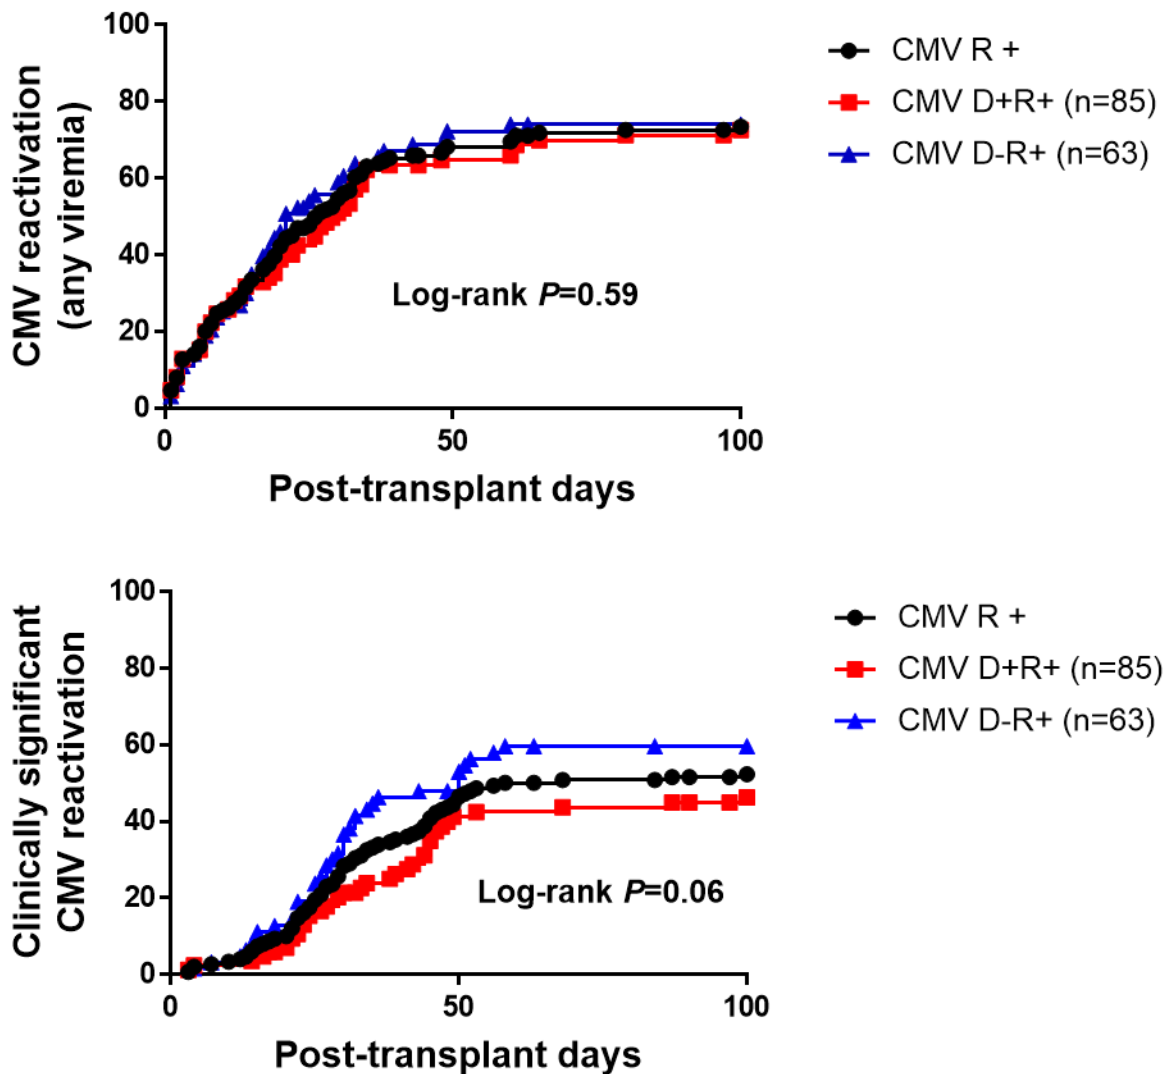

**Supplementary figure 1. Incidence of CMV among CMV-seropositive recipients.** 100-day CMV reactivation any viremia (top) and clinically significant CMV infection (bottom) are shown. The 100-day incidence of CMV reactivation was dependent on the donor/recipient (D/R) CMV serostatus as follows: 74, 73, 20 and 5% for any CMV viremia ( $P < 0.0001$ ); and 60, 46, 20 and 5% for cs-CMVi ( $P = 0.003$ ), in D-/R+, D+/R+, D+/R- and D-/R- groups respectively. Only data for seropositive donors ( $n = 149$ ) are shown in the figure. There was one donor in whom the CMV serology was equivocal, therefore the sum of D+/R+ and D-/R+ only adds to 148. D, donor. R, recipient.

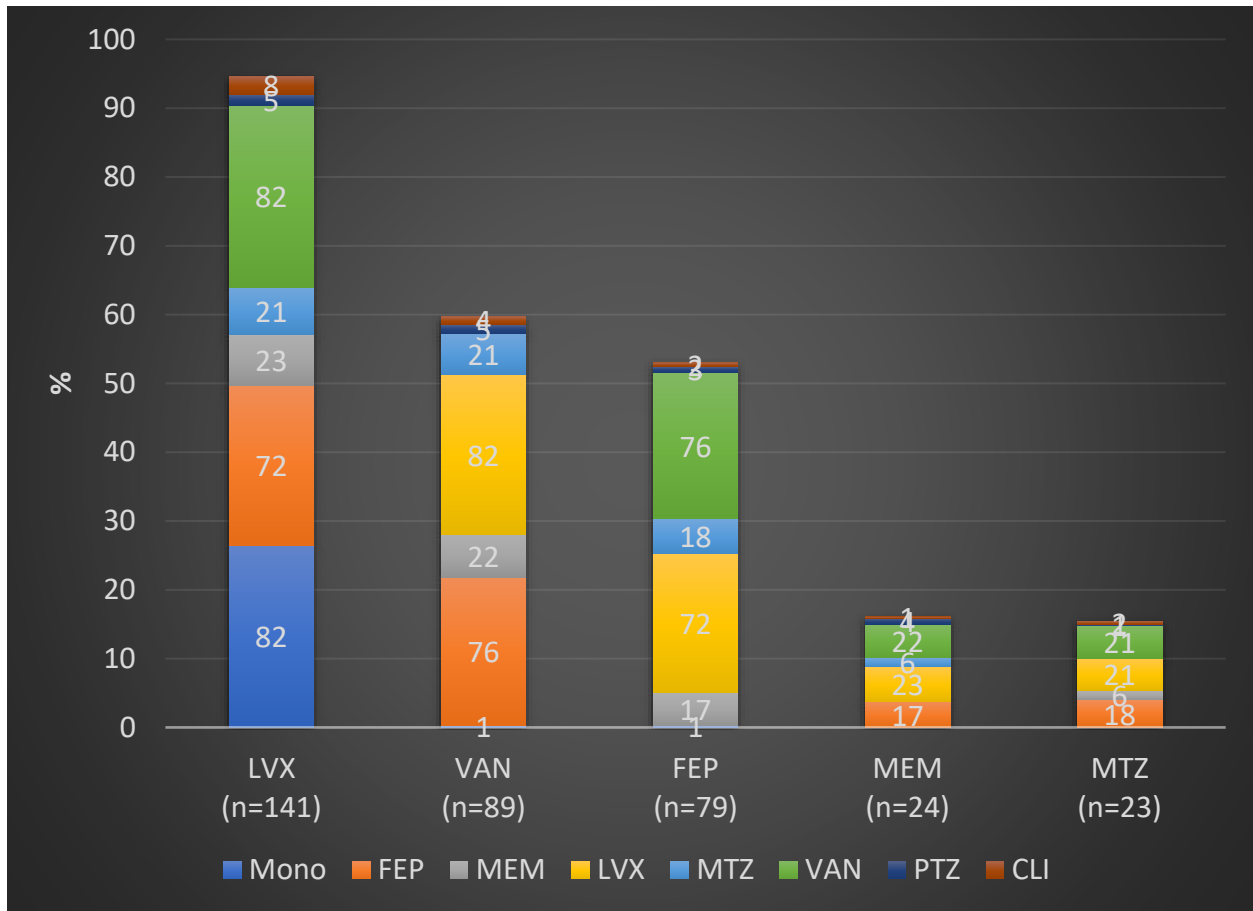

**Supplementary figure 2. Antibiotic exposure by day +14 following allogeneic HCT.**

Exposures for the five most common antibiotics are shown. For vancomycin, only intravenous vancomycin exposure was considered in the present study. Each column corresponds to a single antibiotic. Monotherapy or concurrent exposures by day +14 are shown in color code within each column and numbers in the insert correspond to a given specific antibiotic combination. For example, 141 (94%) of the patients were exposed to levofloxacin during the first 14 days post-transplant; 82 of them received it as monotherapy, while 72 of them were subsequently exposed to cefepime and 23 to meropenem within the same period. Fifty-six (38%) patients received antibiotics as prophylaxis only; others underwent antibiotic escalation for culture-negative neutropenic fever in 67 (45%), bacteremia in 18 (12%) and other reason in 8 (5%) cases. Causes

of bacteremia were as follows: *Escherichia coli* (n=10), *Pseudomonas aeruginosa* (n=2), *Streptococcus mitis* (n=2), *Propionibacterium acnes* (n=1), *Klebsiella pneumoniae* (n=1), *Fusobacterium spp.* (n=1), *coagulase-negative Staphylococcus* (n=1). Median duration of antibiotic exposure was as follows: levofloxacin (94%; median 7 days, range 1-14), intravenous vancomycin (60%; median 5 days, range 1-14), cefepime (53%; median: 7 days, range 1-14), meropenem (16%; median: 7 days, range 1-14), metronidazole (15%; median: 9 days, range 1-14), clindamycin (5%; median: 2 days, range 2-5), and piperacillin-tazobactam (3%; median: 3 days, range 1-6). Mono, monotherapy; LVX, levofloxacin; VAN, vancomycin; FEP, cefepime; MEM, meropenem; MTZ, metronidazole; piperacillin-tazobactam; CLI, clindamycin.

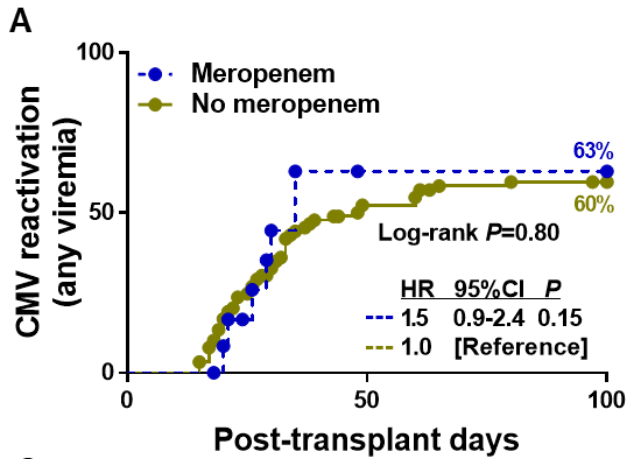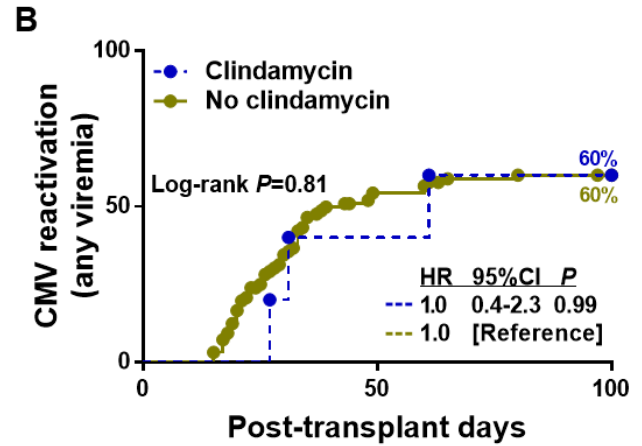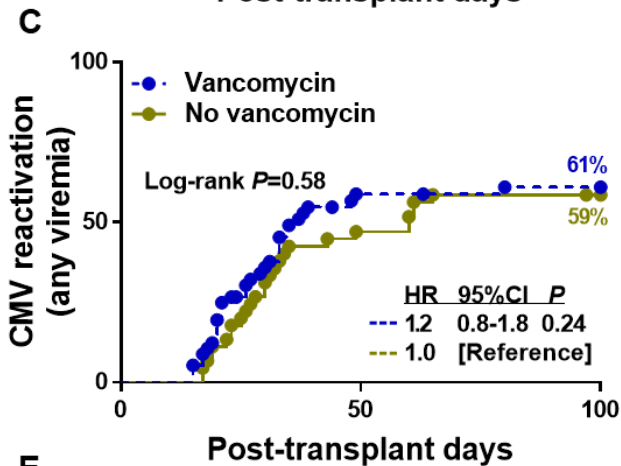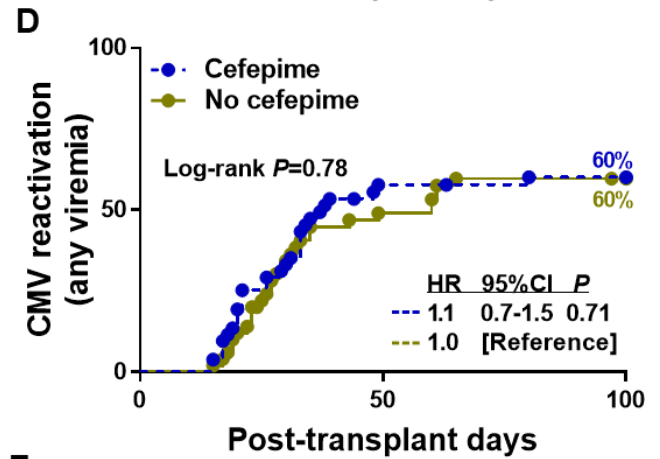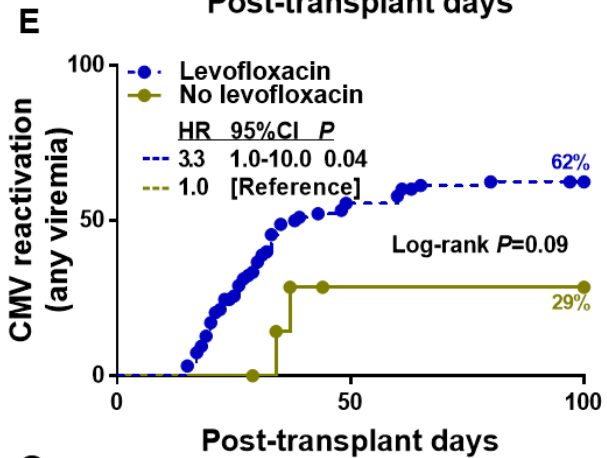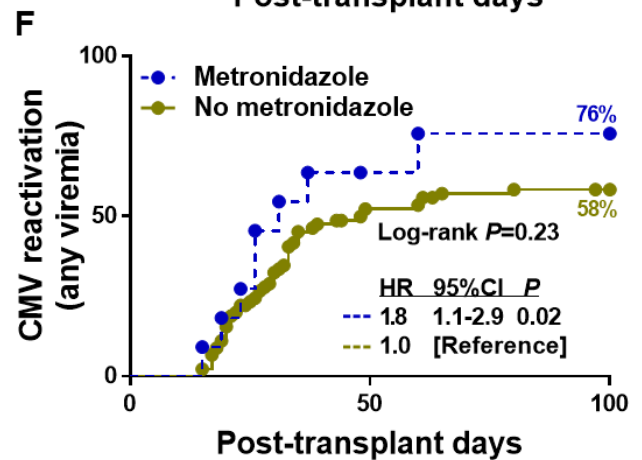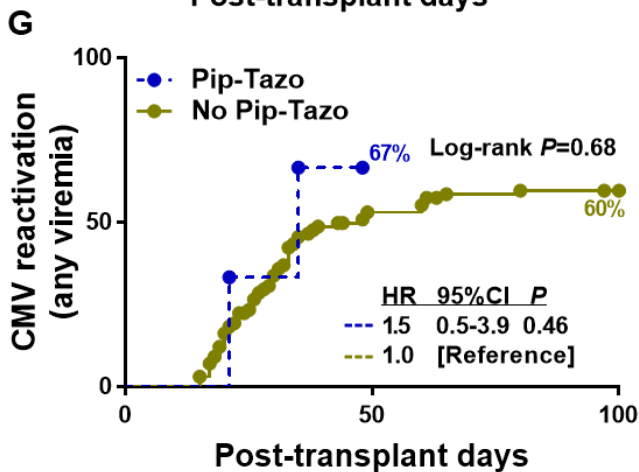

**Supplementary figure 3. 100-day cumulative incidence of CMV reactivation (any viremia) by antibiotic use by day +14.** Number of subjects in Log-rank analysis was as follows: meropenem (n=13), no meropenem (n=89); clindamycin (n=5), no clindamycin (n=97); vancomycin (n=57), no vancomycin (n=45); cefepime (n=52), no cefepime (n=50); levofloxacin (n=94), no levofloxacin (n=8); metronidazole (n=11), no metronidazole (n=91); piperacillin-tazobactam (n=3), no piperacillin-tazobactam (n=99). Insert corresponds to hazard ratios estimated by using Cox regression. CMV, cytomegalovirus.



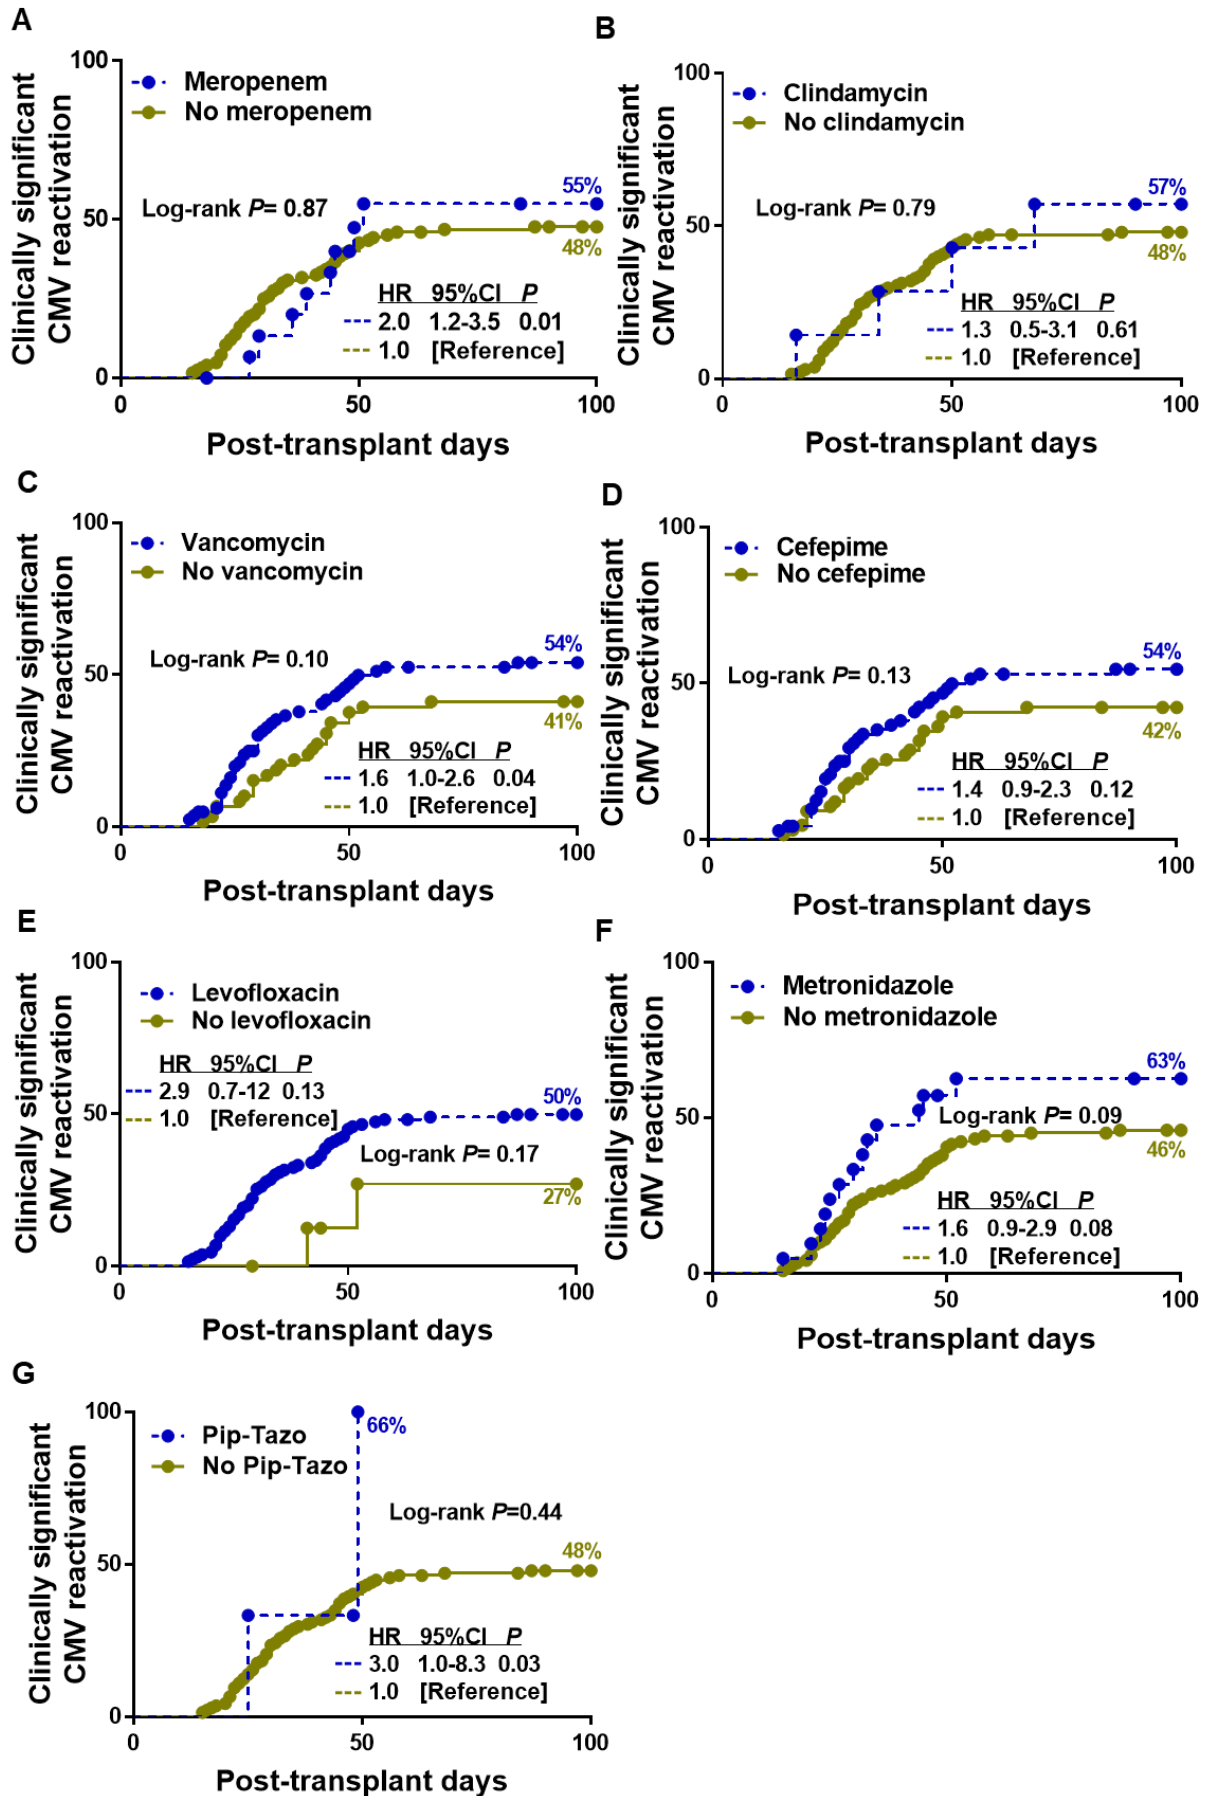

**Supplementary figure 4. 100-day cumulative incidence of clinically significant CMV reactivation by antibiotic use by day +14.** Number of subjects in Log-rank analysis was as follows: meropenem (n=16), no meropenem (n=124); clindamycin (n=7), no clindamycin (n=133); vancomycin (n=81), no vancomycin (n=59); cefepime (n=73), no cefepime (n=67); levofloxacin (n=131), no levofloxacin (n=9); metronidazole (n=21), no metronidazole (n=119); piperacillin-tazobactam (n=3), no piperacillin-tazobactam (n=137). Insert corresponds to hazard ratios estimated by using Cox regression. CMV, cytomegalovirus.

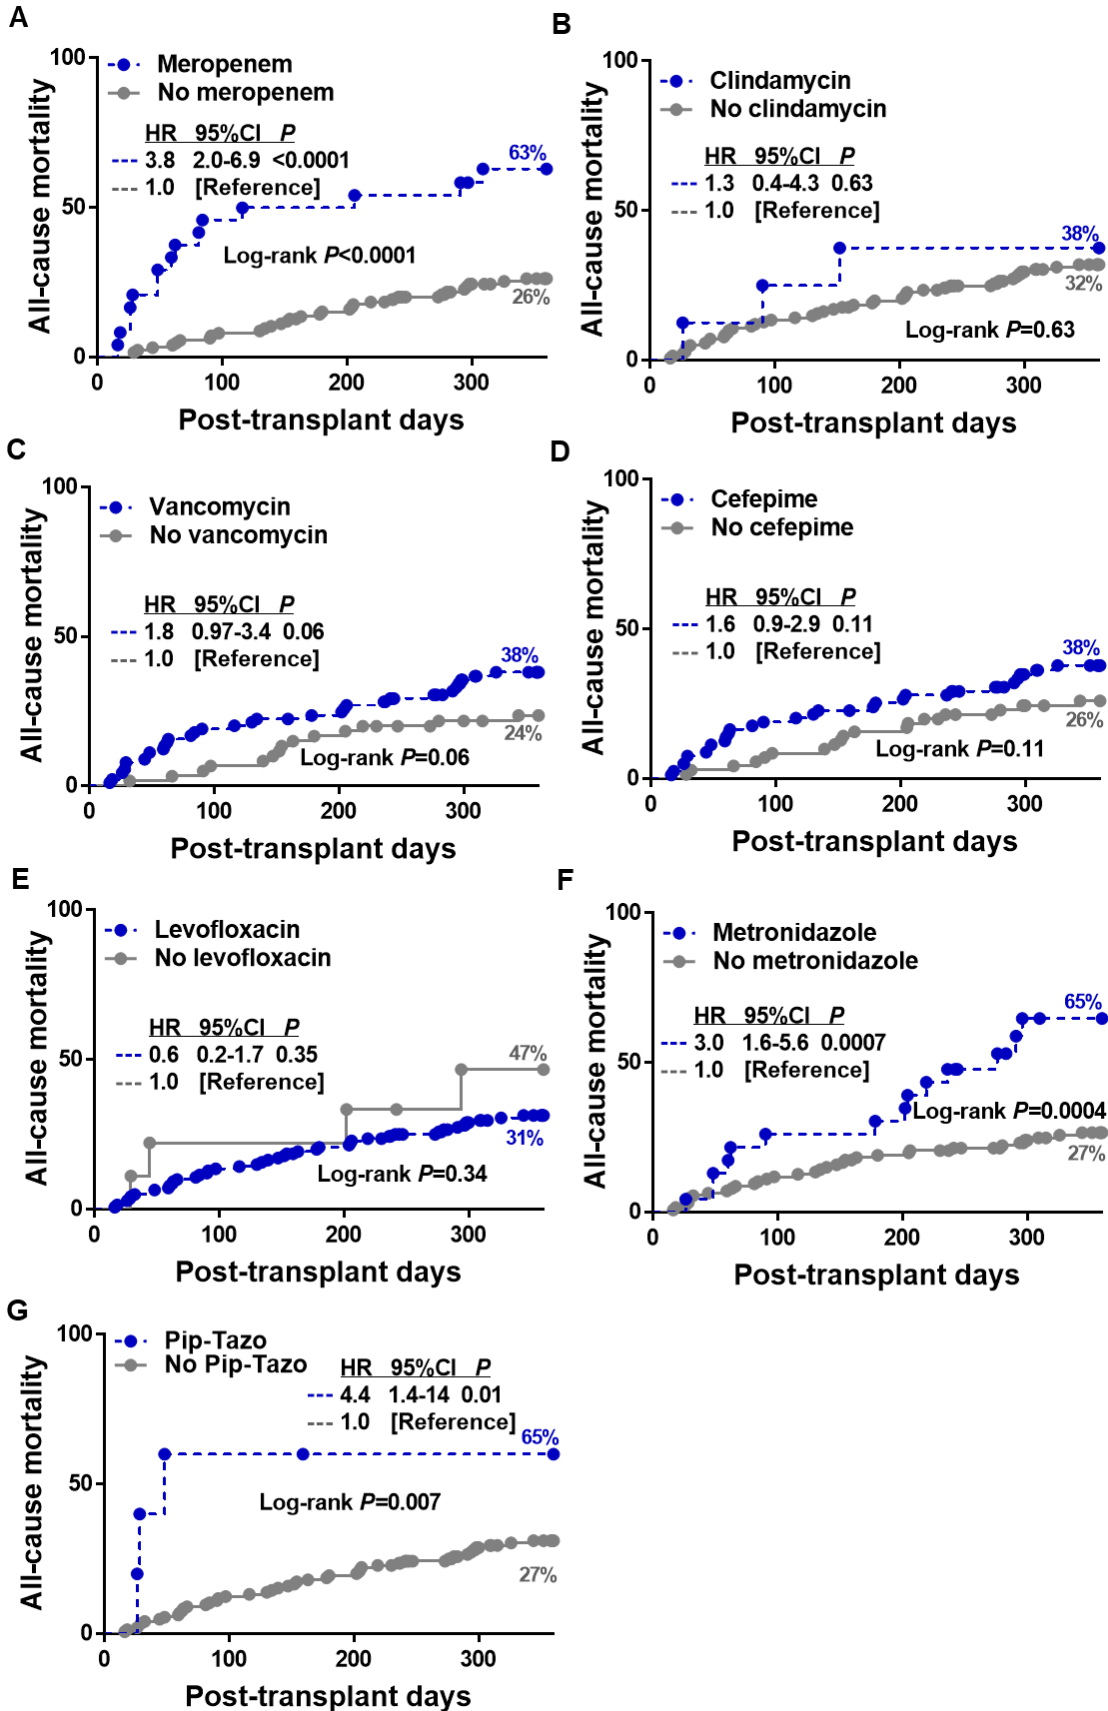

**Supplementary figure 5. One-year cumulative incidence of all-cause mortality by antibiotic use by day +14.** Number of subjects in Log-rank analysis was as follows: meropenem (n=24), no meropenem (n=125); clindamycin (n=8), no clindamycin (n=141); vancomycin (n=89), no vancomycin (n=60); cefepime (n=79), no cefepime (n=70); levofloxacin (n=140), no levofloxacin (n=9); metronidazole (n=23), no metronidazole (n=126); piperacillin-tazobactam (n=5), no piperacillin-tazobactam (n=144). Insert corresponds to hazard ratios estimated by using Cox regression.

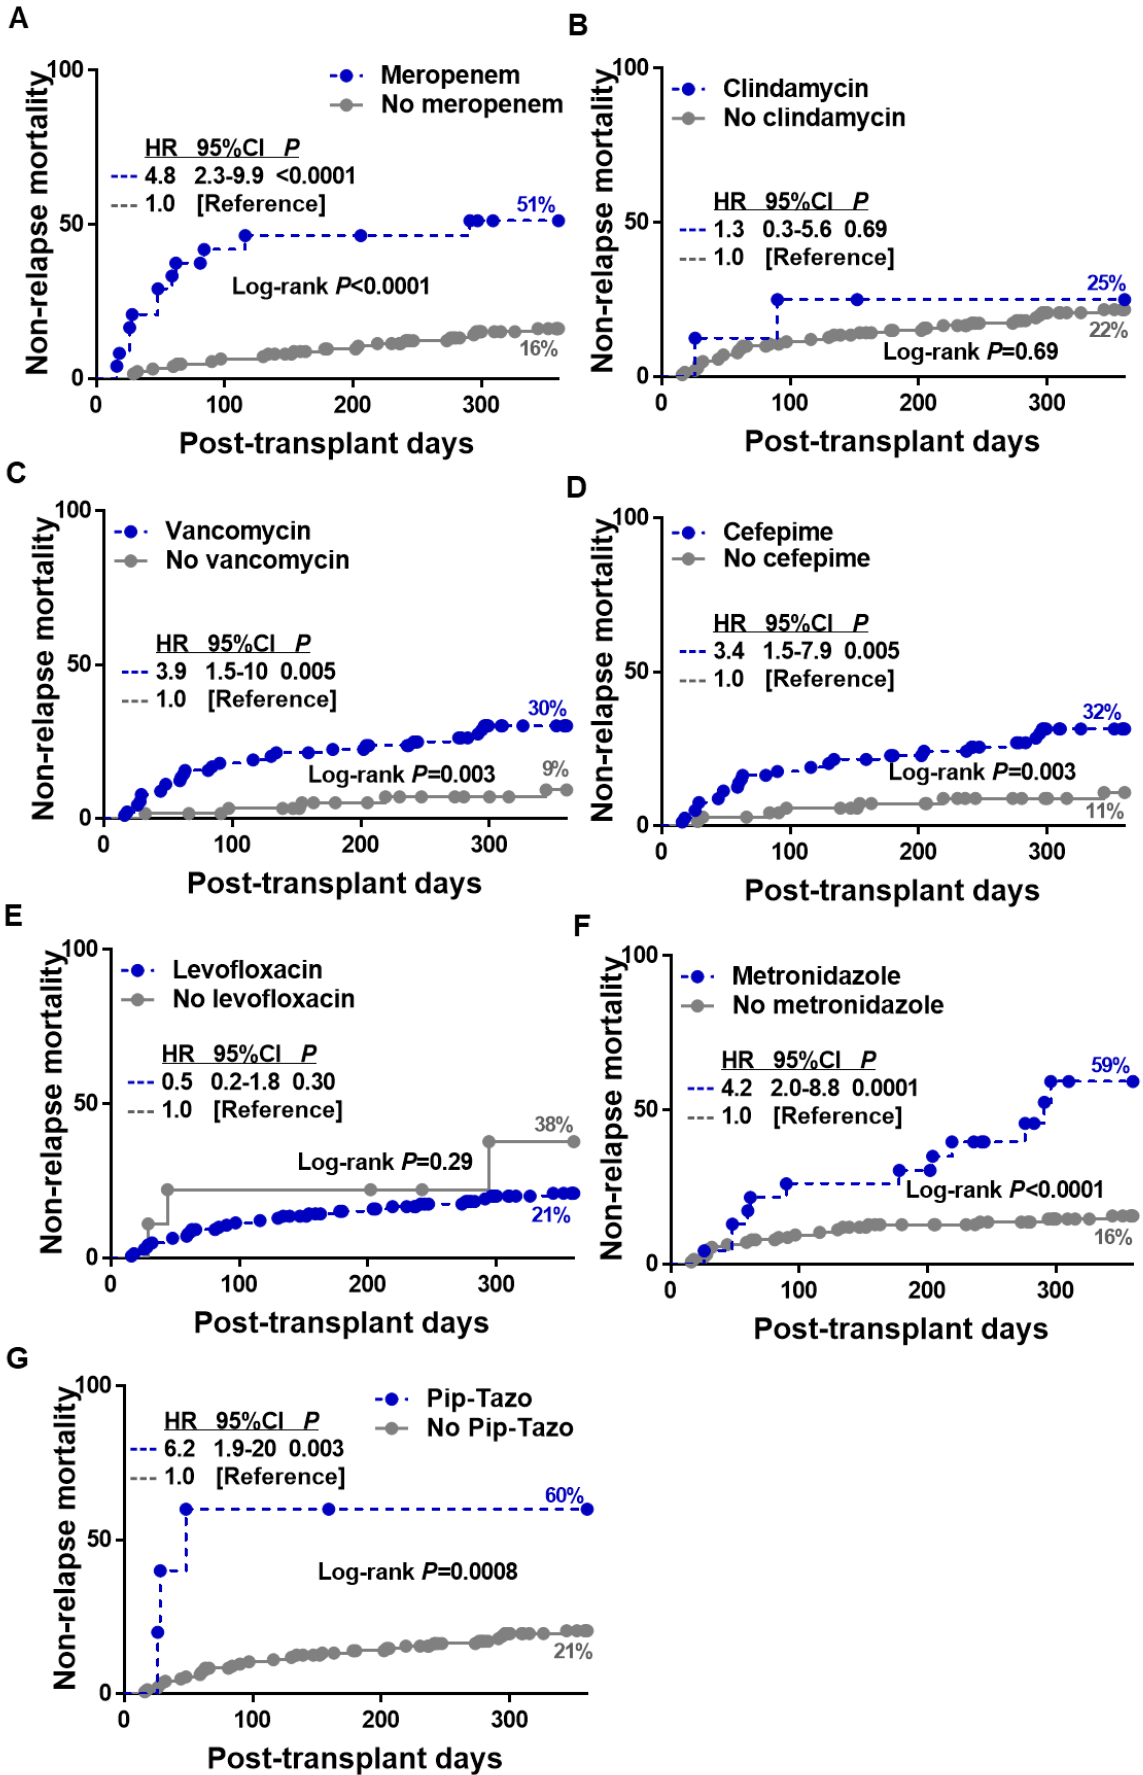

**Supplementary figure 6. One-year cumulative incidence of non-relapse mortality by antibiotic use by day +14.** Number of subjects in Log-rank analysis was as follows: meropenem (n=24), no meropenem (n=125); clindamycin (n=8), no clindamycin (n=141); vancomycin (n=89), no vancomycin (n=60); cefepime (n=79), no cefepime (n=70); levofloxacin (n=140), no levofloxacin (n=9); metronidazole (n=23), no metronidazole (n=126); piperacillin-tazobactam (n=5), no piperacillin-tazobactam (n=144). Insert corresponds to hazard ratios estimated by using Cox regression.

A

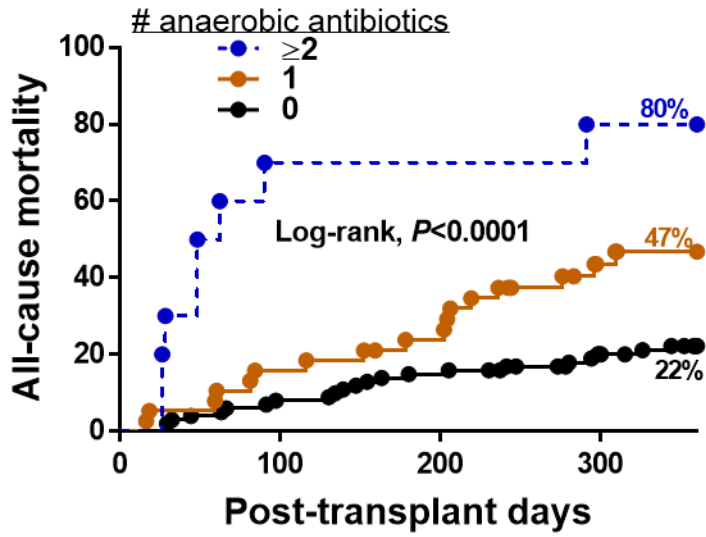

B

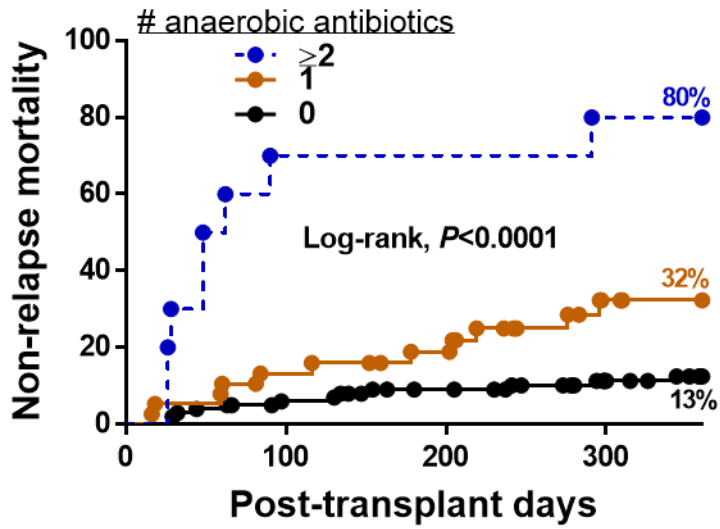

**Supplementary figure 7. Increased mortality in patients exposed to anaerobic antibiotics.**

Panel A corresponds to one-year cumulative incidence of all-cause mortality by anaerobic antibiotic use by day +14. Panel B corresponds to one-year cumulative incidence of non-relapse mortality by anaerobic antibiotic use by day +14. Number of subjects in Log-rank analysis was as follows: >2 (n=10), 1 (n=38) or 0 (n=101) anaerobic antibiotics.
